# Supplementary material for: Heat and Helium-3 Fluxes from Teide Volcano, Canary Islands, Spain
Source: Hindawi journal article supplement (doi:10.1155/2019/3983864), 2019-06-23
Supplement: f1 [file 3983864.f1.docx]

| **WP** | **Longitude**  **(UTM, m)** | **Latitude**  **(UTM, m)** | **Altitude**  **(m)** | **Tamb**  **(ºC)** | **T15**  **(ºC)** | **T40**  **(ºC)** | **CO2 flux**  **(g m-2d-1)** | **Heat flux**  **(W m-2)** | **4He flux**  **(mg m-2 d-1)** |
| --- | --- | --- | --- | --- | --- | --- | --- | --- | --- |
| 1 | 338925 | 3128502 | 3723 | 20.4 | 44.3 | 61.200 | 253.073 | 20.03 | 1.866 |
| 2 | 338915 | 3128504 | 3723 | 12 | 28.4 | 38.700 | 1342.512 | 3.38 | 2.238 |
| 3 | 338905 | 3128508 | 3723 | 17.3 | 48.7 | 50.000 | 3086.405 | 29.25 | 31.174 |
| 4 | 338890 | 3128510 | 3720 | 14.3 | 81.7 | 81.700 | 6154.984 | 231.68 | 16.248 |
| 5 | 338879 | 3128509 | 3717 | 26.8 | 77.2 | 81.700 | 4278.469 | 184.70 | 8.247 |
| 6 | 338868 | 3128490 | 3720 | 31.3 | 64 | 72.600 | 3804.501 | 87.24 | 7.873 |
| 7 | 338885 | 3128495 | 3717 | 25.8 | 21.4 | 28.300 | 130.706 | 1.09 | 0.000 |
| 8 | 338903 | 3128496 | 3718 | 18 | 21.9 | 32.900 | 852.440 | 1.20 | 1.819 |
| 9 | 338915 | 3128494 | 3715 | 19.8 | 63.3 | 71.700 | 8986.116 | 83.49 | 33.644 |
| 10 | 338930 | 3128493 | 3713 | 16.7 | 78.8 | 82.200 | 1898.684 | 200.50 | 5.032 |
| 11 | 338937 | 3128482 | 3716 | 23.8 | 72.7 | 72.300 | 6108.854 | 145.26 | 12.021 |
| 12 | 338946 | 3128474 | 3716 | 25.1 | 59.6 | 63.800 | 666.493 | 65.61 | 1.754 |
| 13 | 338932 | 3128475 | 3716 | 16.8 | 65.9 | 71.100 | 310.203 | 98.07 | 2.477 |
| 14 | 338923 | 3128481 | 3709 | 17.6 | 82.3 | 81.900 | 9608.502 | 238.56 | 12.875 |
| 15 | 338908 | 3128482 | 3709 | 18.5 | 27.3 | 31.400 | 41.124 | 2.89 | 0.000 |
| 16 | 338894 | 3128482 | 3709 | 24.6 | 26.4 | 30.100 | 497.605 | 2.53 | 1.392 |
| 17 | 338881 | 3128478 | 3710 | 24.1 | 81.2 | 81.200 | 4292.538 | 226.06 | 7.837 |
| 18 | 338864 | 3128474 | 3715 | 23.2 | 20.2 | 21.600 | 1030.076 | 0.87 | 0.288 |
| 19 | 338862 | 3128451 | 3698 | 23.9 | 35.8 | 40.800 | 1727.447 | 8.54 | 4.267 |
| 20 | 338873 | 3128429 | 3701 | 25.8 | 41.9 | 53.800 | 937.078 | 16.03 | 4.959 |
| 21 | 338882 | 3128455 | 3705 | 28.5 | 40.1 | 54.100 | 1471.667 | 13.45 | 3.483 |
| 22 | 338875 | 3128466 | 3712 | 20.7 | 76.7 | 79.100 | 5538.209 | 179.96 | 11.057 |
| 23 | 338895 | 3128469 | 3708 | 18.1 | 49.2 | 55.500 | 811.758 | 30.47 | 5.329 |
| 24 | 338910 | 3128471 | 3700 | 29.3 | 73.6 | 81.500 | 5112.490 | 152.59 | 53.570 |
| 25 | 338922 | 3128469 | 3704 | 13.4 | 57.6 | 74.000 | 1772.385 | 57.24 | 5.801 |
| 26 | 338929 | 3128463 | 3709 | 14.6 | 82.4 | 82.800 | 10650.217 | 239.72 | 18.008 |
| 27 | 338943 | 3128461 | 3710 | 15.3 | 67.9 | 79.400 | 2621.848 | 110.53 | 6.337 |
| 28 | 338948 | 3128445 | 3712 | 14 | 45.4 | 37.400 | 114.002 | 22.09 | 1.036 |
| 29 | 338929 | 3128451 | 3699 | 17.3 | 81.9 | 82.100 | 7822.721 | 233.96 | 26.900 |
| 30 | 338914 | 3128454 | 3697 | 17 | 23.4 | 24.500 | 565.130 | 1.56 | 3.374 |
| 31 | 338900 | 3128456 | 3685 | 20 | 70.3 | 41.300 | 825.404 | 127.01 | 2.576 |
| 32 | 338884 | 3128441 | 3699 | 23.1 | 39.3 | 36.100 | 40.357 | 12.40 | 0.560 |
| 33 | 338899 | 3128434 | 3688 | 19.6 | 20.2 | 17.200 | 304.395 | 0.87 | 0.164 |
| 34 | 338889 | 3128425 | 3705 | 22 | 79.1 | 70.900 | 169.368 | 203.57 | 2.457 |
| 35 | 338920 | 3128440 | 3692 | 25.7 | 44.4 | 34.100 | 856.751 | 20.21 | 2.745 |
| 36 | 338904 | 3128445 | 3698 | 19.7 | 30.3 | 27.200 | 1920.809 | 4.38 | 0.000 |
| 37 | 338909 | 3128426 | 3702 | 24.1 | 30.7 | 28.000 | 429.140 | 4.62 | 1.881 |
| 38 | 338929 | 3128429 | 3703 | 19 | 26.4 | 22.200 | 238.226 | 2.53 | 1.327 |
| 39 | 338907 | 3128526 | 3721 | 17.6 | 57.7 | 47.400 | 984.167 | 57.64 | 6.688 |
| 40 | 338921 | 3128552 | 3701 | 20.8 | 40.3 | 26.700 | 1922.003 | 13.72 | 14.524 |
| 41 | 338928 | 3128585 | 3681 | 20.8 | 36.8 | 31.600 | 1073.457 | 9.54 | 15.565 |
| 42 | 338878 | 3128598 | 3673 | 18.5 | 32.9 | 32.500 | 3513.269 | 6.09 | 31.217 |
| 43 | 338924 | 3128629 | 3654 | 21 | 4.9 | 37.300 | 2092.626 | 0.00 | 16.865 |
| 44 | 338918 | 3128675 | 3625 | 16.4 | 22.6 | 18.900 | 348.877 | 1.36 | 113.790 |
| 45 | 338920 | 3128751 | 3572 | 25.3 | 17.3 | 16.400 | 63.415 | 0.47 | 1.704 |
| 46 | 338987 | 3128738 | 3582 | 24.1 | 17.2 | 17.300 | 58.762 | 0.46 | 0.000 |
| 47 | 338994 | 3128797 | 3552 | 28.3 | 20.8 | 22.800 | 11.493 | 0.97 | 1.642 |
| 48 | 339067 | 3128782 | 3536 | 17.2 | 19.5 | 19.700 | 36.906 | 0.75 | 2.367 |
| 49 | 338916 | 3128408 | 3682 | 14.8 | 23.8 | 31.400 | 179.734 | 1.67 | 1.127 |
| 50 | 338942 | 3128374 | 3666 | 16.9 | 47.7 | 50.700 | 1635.916 | 26.92 | 3.764 |
| 51 | 338972 | 3128347 | 3644 | 17.7 | 42.3 | 54.000 | 288.667 | 16.65 | 1.862 |
| 52 | 338915 | 3128342 | 3646 | 18.6 | 19.4 | 24.700 | 9.770 | 0.74 | 0.717 |
| 53 | 338907 | 3128281 | 3617 | 18.1 | 18.1 | 20.900 | 0.000 | 0.56 | 3.247 |
| 54 | 338986 | 3128276 | 3611 | 21.6 | 22.8 | 27.100 | 166.449 | 1.41 | 1.164 |
| 55 | 339086 | 3128203 | 3561 | 23.3 | 30.9 | 33.800 | 252.595 | 4.74 | 0.857 |
| 56 | 339011 | 3128208 | 3579 | 22.2 | 24.5 | 26.400 | 0.000 | 1.87 | 0.000 |
| 57 | 338940 | 3128206 | 3572 | 23.1 | 23.7 | 31.200 | 173.570 | 1.64 | 1.377 |
| 58 | 338885 | 3128208 | 3571 | 22.1 | 20.2 | 20.200 | 0.000 | 0.87 | 0.000 |
| 59 | 338853 | 3128153 | 3541 | 22.2 | 21.2 | 19.000 | 0.000 | 1.05 | 0.000 |
| 60 | 338920 | 3128124 | 3541 | 22.6 | 32.4 | 32.900 | 182.321 | 5.73 | 3.154 |
| 61 | 339008 | 3128119 | 3541 | 20.6 | 22.1 | 25.200 | 0.000 | 1.24 | 8.390 |
| 62 | 339131 | 3128142 | 3654 | 19.7 | 16.4 | 14.300 | 0.000 | 0.38 | 0.101 |
| 63 | 338866 | 3128469 | 3708 | 26.8 | 20.8 | 22.700 | 218.673 | 0.97 | 0.185 |
| 64 | 338835 | 3128466 | 3694 | 24.9 | 18.2 | 14.900 | 219.962 | 0.57 | 0.105 |
| 65 | 338819 | 3128450 | 3674 | 28.6 | 21.1 | 15.200 | 30.044 | 1.03 | 0.000 |
| 66 | 338787 | 3128473 | 3659 | 29.3 | 15.9 | 18.900 | 0.000 | 0.33 | 0.170 |
| 67 | 338777 | 3128445 | 3650 | 30.6 | 23.6 | 23.300 | 1.874 | 1.61 | 1.928 |
| 68 | 338739 | 3128465 | 3630 | 26.6 | 21.3 | 24.100 | 15.815 | 1.07 | 0.116 |
| 69 | 338740 | 3128421 | 3619 | 28.6 | 27.9 | 26.300 | 579.776 | 3.15 | 0.000 |
| 70 | 338682 | 3128449 | 3600 | 29.8 | 18.5 | 23.300 | 13.553 | 0.61 | 0.000 |
| 71 | 338689 | 3128408 | 3594 | 26.6 | 25.3 | 21.900 | 49.576 | 2.13 | 0.000 |
| 72 | 338714 | 3128356 | 3590 | 26 | 25.3 | 21.900 | 735.192 | 2.13 | 0.643 |
| 73 | 338655 | 3128377 | 3564 | 24.8 | 29.5 | 24.000 | 277.354 | 3.94 | 0.000 |
| 74 | 338622 | 3128450 | 3556 | 30.7 | 16 | 19.000 | 2.505 | 0.34 | 0.276 |
| 75 | 338585 | 3128467 | 3532 | 35.7 | 14.4 | 15.100 | 0.570 | 0.22 | 0.181 |
| 76 | 338590 | 3128395 | 3532 | 31.8 | 22.1 | 21.200 | 0.000 | 1.24 | 0.284 |
| 77 | 338613 | 3128338 | 3532 | 33.6 | 25.3 | 21.600 | 11.820 | 2.13 | 0.969 |
| 78 | 338966 | 3128471 | 3707 | 22.3 | 36.2 | 41.200 | 547.985 | 8.93 | 2.391 |
| 79 | 338986 | 3128468 | 3692 | 22.2 | 27.9 | 31.900 | 2498.821 | 3.15 | 12.986 |
| 80 | 339017 | 3128487 | 3674 | 25.8 | 24.3 | 22.300 | 146.969 | 1.81 | 0.120 |
| 81 | 339046 | 3128493 | 3652 | 24.3 | 22.8 | 20.300 | 45.896 | 1.41 | 0.233 |
| 82 | 339057 | 3128455 | 3650 | 24.1 | 27.4 | 27.400 | 330.749 | 2.93 | 3.084 |
| 83 | 339056 | 3128405 | 3635 | 21 | 20.2 | 20.200 | 183.093 | 0.87 | 0.000 |
| 84 | 339089 | 3128475 | 3629 | 22.3 | 32.7 | 32.700 | 163.076 | 5.95 | 2.103 |
| 85 | 339082 | 3128544 | 3658 | 21.3 | 44.9 | 44.900 | 1104.746 | 21.13 | 18.215 |
| 86 | 339111 | 3128456 | 3617 | 21.2 | 24.5 | 24.500 | 379.723 | 1.87 | 9.928 |
| 87 | 339121 | 3128406 | 3602 | 22.8 | 22.6 | 22.600 | 67.827 | 1.36 | 0.885 |
| 88 | 339169 | 3128447 | 3590 | 23.1 | 24.9 | 24.900 | 73.555 | 2.00 | 1.836 |
| 89 | 339164 | 3128369 | 3590 | 22.9 | 17.7 | 17.700 | 2.374 | 0.51 | 0.000 |
| 90 | 339230 | 3128427 | 3590 | 26.8 | 21.8 | 21.800 | 0.000 | 1.17 | 0.000 |
| 91 | 339222 | 3128366 | 3590 | 24 | 16.9 | 16.900 | 0.000 | 0.42 | 0.000 |
| 92 | 339286 | 3128380 | 3572 | 22.7 | 20.2 | 20.200 | 0.000 | 0.87 | 0.255 |
| 93 | 338853 | 3128516 | 3705 | 22.7 | 29.4 | 31.800 | 283.399 | 3.89 | 2.972 |
| 94 | 338860 | 3128549 | 3679 | 14.7 | 44.5 | 46.100 | 1326.300 | 20.39 | 22.542 |
| 95 | 338831 | 3128541 | 3672 | 15.6 | 16.3 | 19.900 | 6.179 | 0.37 | 5.246 |
| 96 | 338791 | 3128546 | 3651 | 16.1 | 22.6 | 21.700 | 413.166 | 1.36 | 5.459 |
| 97 | 338813 | 3128601 | 3641 | 18.4 | 16.3 | 17.300 | 169.527 | 0.37 | 0.000 |
| 98 | 338846 | 3128632 | 3636 | 17.6 | 18.5 | 19.000 | 0.000 | 0.61 | 1.632 |
| 99 | 338867 | 3128666 | 3621 | 18.5 | 16.7 | 17.100 | 1053.256 | 0.40 | 0.000 |
| 100 | 338796 | 3128640 | 3609 | 22.6 | 20.8 | 24.300 | 4.330 | 0.97 | 0.185 |
| 101 | 338744 | 3128610 | 3599 | 17.7 | 18.9 | 19.900 | 738.972 | 0.66 | 5.014 |
| 102 | 338680 | 3128606 | 3572 | 19.3 | 15.2 | 14.400 | 0.000 | 0.28 | 0.000 |
| 103 | 338627 | 3128626 | 3540 | 21.3 | 16.7 | 15.400 | 0.000 | 0.40 | 0.000 |
| 104 | 338749 | 3128691 | 3579 | 20.3 | 16.4 | 14.300 | 279.641 | 0.38 | 0.852 |
| 105 | 338819 | 3128705 | 3594 | 22.4 | 13.6 | 12.900 | 0.000 | 0.18 | 0.135 |
| 106 | 338842 | 3128749 | 3567 | 22.1 | 17.2 | 16.200 | 0.000 | 0.46 | 0.000 |
| 107 | 338692 | 3128726 | 3529 | 22.9 | 17.8 | 16.400 | 70.983 | 0.52 | 0.151 |
| 108 | 338625 | 3128709 | 3530 | 22.5 | 16.8 | 18.800 | 0.000 | 0.41 | 0.133 |
| 109 | 338719 | 3128806 | 3530 | 22.4 | 16.3 | 16.200 | 0.000 | 0.37 | 0.000 |
| 110 | 338802 | 3128789 | 3534 | 22.6 | 17.2 | 12.900 | 0.000 | 0.46 | 0.591 |
| 111 | 338884 | 3128801 | 3541 | 22.3 | 19.1 | 14.700 | 0.000 | 0.69 | 0.290 |
| 112 | 338970 | 3128434 | 3575 | 22.2 | 24.7 | 24.600 | 594.299 | 1.94 | 7.285 |
| 113 | 339003 | 3128407 | 3575 | 29.6 | 24.3 | 23.700 | 855.173 | 1.81 | 0.106 |
| 114 | 339001 | 3128372 | 3575 | 27.2 | 25.4 | 24.800 | 82.497 | 2.16 | 0.109 |
| 115 | 339071 | 3128372 | 3575 | 24.2 | 15.4 | 15.600 | 6.057 | 0.29 | 0.113 |
| 116 | 339040 | 3128329 | 3575 | 27.6 | 21.8 | 20.100 | 1.727 | 1.17 | 0.000 |
| 117 | 339076 | 3128300 | 3575 | 30.7 | 23.3 | 19.600 | 4.036 | 1.53 | 0.117 |
| 118 | 339105 | 3128339 | 3604 | 27.6 | 21.8 | 20.100 | 6329.833 | 1.17 | 0.000 |
| 119 | 339125 | 3128273 | 3580 | 21.2 | 32.1 | 33.600 | 261.304 | 5.52 | 3.412 |
| 120 | 339172 | 3128256 | 3561 | 22.5 | 19.2 | 19.200 | 0.000 | 0.71 | 0.000 |
| 121 | 339242 | 3128252 | 3575 | 27.2 | 21.9 | 21.900 | 0.000 | 1.20 | 0.403 |
| 122 | 338849 | 3128423 | 3693 | 20.7 | 21.3 | 19.600 | 140.516 | 1.07 | 0.421 |
| 123 | 338828 | 3128398 | 3674 | 14.7 | 20.4 | 23.600 | 449.069 | 0.90 | 2.286 |
| 124 | 338864 | 3128370 | 3665 | 19.8 | 30.3 | 27.200 | 4.348 | 4.38 | 0.000 |
| 125 | 338851 | 3128333 | 3645 | 20.4 | 14.9 | 13.600 | 10.348 | 0.26 | 0.000 |
| 126 | 338768 | 3128365 | 3634 | 22.7 | 24.6 | 22.000 | 636.454 | 1.90 | 0.000 |
| 127 | 338754 | 3128320 | 3600 | 23.6 | 22.3 | 20.600 | 194.212 | 1.29 | 0.000 |
| 128 | 338793 | 3128289 | 3589 | 24.9 | 21.3 | 21.500 | 332.310 | 1.07 | 0.542 |
| 129 | 338842 | 3128255 | 3580 | 28.5 | 13.6 | 14.000 | 2.409 | 0.18 | 0.000 |
| 130 | 338819 | 3128216 | 3564 | 28.8 | 14.6 | 13.700 | 1.193 | 0.24 | 0.000 |
| 131 | 338764 | 3128234 | 3557 | 26.9 | 15.7 | 17.800 | 75.825 | 0.32 | 0.105 |
| 132 | 338723 | 3128260 | 3552 | 29.8 | 20.9 | 22.000 | 36.264 | 0.99 | 0.000 |
| 133 | 338696 | 3128310 | 3570 | 28.6 | 27.7 | 25.700 | 1579.711 | 3.06 | 0.452 |
| 134 | 338632 | 3128280 | 3521 | 32.6 | 23.8 | 22.100 | 142.858 | 1.67 | 0.177 |
| 135 | 338606 | 3128273 | 3514 | 26.9 | 20.5 | 19.300 | 61.697 | 0.92 | 0.155 |
| 136 | 338679 | 3128221 | 3523 | 23.2 | 19 | 22.200 | 0.000 | 0.68 | 0.104 |
| 137 | 338654 | 3128159 | 3520 | 21.7 | 23.7 | 25.600 | 0.000 | 1.64 | 4.804 |
| 138 | 338703 | 3128168 | 3516 | 26.4 | 17.7 | 18.400 | 0.000 | 0.51 | 0.000 |
| 139 | 338759 | 3128152 | 3514 | 22.6 | 22.1 | 22.700 | 0.000 | 1.24 | 0.433 |
| 140 | 338795 | 3128145 | 3532 | 24.4 | 18.7 | 21.100 | 0.000 | 0.64 | 0.000 |
| 142 | 338951 | 3128494 | 3719 | 22 | 55.4 | 70.400 | 982.655 | 48.98 | 3.156 |
| 143 | 338967 | 3128498 | 3700 | 19.6 | 30.4 | 34.100 | 783.550 | 4.44 | 2.072 |
| 144 | 338970 | 3128519 | 3687 | 23.3 | 24.1 | 29.400 | 10.922 | 1.75 | 0.000 |
| 145 | 338995 | 3128520 | 3665 | 23.1 | 74.7 | 77.900 | 388.602 | 161.91 | 1.814 |
| 146 | 339029 | 3128540 | 3651 | 24.9 | 27.1 | 30.300 | 142.021 | 2.80 | 0.636 |
| 147 | 339011 | 3128568 | 3655 | 22.8 | 33.6 | 41.500 | 223.100 | 6.63 | 1.083 |
| 148 | 338983 | 3128612 | 3647 | 25.5 | 25.1 | 24.300 | 30.981 | 2.06 | 0.000 |
| 149 | 339011 | 3128660 | 3614 | 25.1 | 25 | 25.400 | 103.378 | 2.03 | 0.000 |
| 150 | 339047 | 3128702 | 3600 | 20.6 | 60 | 60.200 | 29.176 | 67.39 | 0.000 |
| 151 | 339071 | 3128651 | 3593 | 26 | 22.6 | 20.500 | 38.532 | 1.36 | 0.000 |
| 152 | 339096 | 3128604 | 3598 | 27.2 | 33.7 | 42.100 | 588.179 | 6.71 | 3.885 |
| 153 | 339113 | 3128556 | 3601 | 26.2 | 35.2 | 43.100 | 583.574 | 7.98 | 8.055 |
| 154 | 339118 | 3128514 | 3608 | 21.8 | 34.8 | 36.600 | 407.620 | 7.63 | 2.184 |
| 155 | 339175 | 3128529 | 3583 | 25.1 | 35.5 | 37.600 | 1052.627 | 8.26 | 6.375 |
| 156 | 339236 | 3128516 | 3570 | 30.5 | 32.3 | 33.100 | 878.095 | 5.66 | 6.373 |
| 157 | 339170 | 3128613 | 3562 | 25.6 | 24.4 | 26.900 | 1030.632 | 1.84 | 0.000 |
| 158 | 339159 | 3128664 | 3561 | 30 | 29.1 | 25.800 | 209.333 | 3.73 | 0.000 |
| 159 | 339135 | 3128699 | 3551 | 22.8 | 17.3 | 19.800 | 41.515 | 0.47 | 0.000 |
| 160 | 339095 | 3128746 | 3546 | 26 | 16.2 | 16.300 | 3.271 | 0.36 | 0.000 |
| 161 | 339128 | 3128796 | 3514 | 18.6 | 12.9 | 13.300 | 0.000 | 0.14 | 0.000 |
| 162 | 339166 | 3128756 | 3521 | 27.6 | 14.4 | 14.400 | 1.441 | 0.22 | 0.393 |
| 163 | 339212 | 3128722 | 3530 | 25.1 | 22.8 | 24.800 | 162.885 | 1.41 | 0.000 |
| 164 | 339233 | 3128812 | 3540 | 22 | 26.1 | 26.800 | 843.329 | 2.41 | 2.753 |
| 165 | 339282 | 3128745 | 3540 | 29.4 | 22.2 | 22.500 | 57.688 | 1.26 | 0.000 |
| 166 | 339232 | 3128667 | 3550 | 29.6 | 31.2 | 30.300 | 159.310 | 4.93 | 0.000 |
| 167 | 339255 | 3128614 | 3555 | 28.6 | 38.3 | 37.300 | 793.117 | 11.19 | 11.011 |
| 168 | 339295 | 3128551 | 3562 | 26.8 | 25.6 | 19.900 | 3.217 | 2.23 | 0.000 |
| 112b | 338973 | 3128401 | 3575 | 25.5 | 26.7 | 28.100 | 297.388 | 2.64 | 2.393 |
| 118b | 339149 | 3128329 | 3604 | 26.1 | 21.1 | 18.100 | 12.338 | 1.03 | 0.801 |
| 62b | 339101 | 3128179 | 3538 | 21.1 | 23.4 | 24.500 | 5426.7126 | 1.56 | 31.411 |

| **WP** | **4He (ppm)** | **Ne (ppm)** | **H2 (ppm)** | **O2**  **(ppm)** | **N2**  **(ppm)** | **CH4 (ppm)** | **CO2 (ppm)** | **H2S (ppm)** | **H2O (ppm)** | **δ13C-CO2**  **‰ vs. VPDB** |
| --- | --- | --- | --- | --- | --- | --- | --- | --- | --- | --- |
| 1 | 12.89 | 9.17 | 2046.35 | 47559.85 | 179888.16 | 5.71 | 764699.89 | 0.00 | 854.36 | -2.97 |
| 2 | 8.71 | 11.80 | 93.83 | 60435.61 | 238384.66 | 3.78 | 690325.71 | 0.00 | 949.04 | -2.12 |
| 3 | 6.58 | 17.65 | 105.94 | 194197.70 | 730988.02 | 1.83 | 59723.25 | 0.00 | 788.32 | -2.81 |
| 4 | 12.57 | 14.38 | 1093.12 | 102587.01 | 389962.54 | 4.05 | 477275.14 | 0.00 | 786.09 | -3.13 |
| 5 | 14.31 | 7.00 | 2163.54 | 26839.19 | 117151.78 | 5.81 | 851479.26 | 0.00 | 1014.22 | -3.05 |
| 6 | 9.72 | 13.54 | 873.61 | 103384.38 | 395542.42 | 4.05 | 479396.54 | 0.00 | 1032.65 | -3.13 |
| 7 | 5.49 | 17.21 | 24.45 | 168771.71 | 635927.57 | 1.75 | 167146.60 | 0.00 | 1369.46 | 0.17 |
| 8 | 6.97 | 16.09 | 25.98 | 126317.32 | 477128.97 | 3.53 | 370528.50 | 0.00 | 1132.26 | -1.17 |
| 9 | 6.78 | 16.86 | 51.86 | 169858.35 | 641069.39 | 2.45 | 166080.18 | 0.00 | 1073.39 | -3.07 |
| 10 | 15.29 | 5.35 | 1719.17 | 27089.78 | 106858.36 | 5.71 | 861018.73 | 0.00 | 1020.59 | -2.97 |
| 11 | 11.46 | 11.62 | 1152.00 | 81039.27 | 309843.29 | 4.32 | 588981.00 | 0.00 | 1030.43 | -2.78 |
| 12 | 7.53 | 15.12 | 39.65 | 127037.37 | 484677.25 | 2.94 | 355856.85 | 0.00 | 1436.02 | -2.85 |
| 13 | 15.44 | 6.31 | 2852.42 | 12802.57 | 49682.11 | 5.71 | 926114.52 | 437.59 | 1566.93 | -2.87 |
| 14 | 9.55 | 10.35 | 2041.17 | 58224.51 | 219685.70 | 5.33 | 694729.61 | 0.00 | 1578.61 | -2.92 |
| 15 | 5.50 | 17.84 | 61.62 | 196660.22 | 739357.28 | 4.95 | 34463.24 | 0.00 | 1460.72 | -6.27 |
| 16 | 6.13 | 17.27 | 41.78 | 153685.47 | 578806.36 | 1.70 | 232693.21 | 0.00 | 1521.75 | -1.19 |
| 17 | 10.68 | 11.45 | 1123.09 | 72167.27 | 278037.61 | 4.95 | 617452.07 | 0.00 | 1675.13 | -2.90 |
| 18 | 6.58 | 16.54 | 54.06 | 157900.90 | 596658.60 | 1.70 | 210253.77 | 0.00 | 1537.30 | -3.15 |
| 19 | 7.13 | 16.09 | 18.56 | 140600.33 | 534333.44 | 1.70 | 289213.19 | 0.00 | 1555.03 | -3.01 |
| 20 | 6.62 | 17.33 | 5.78 | 178145.23 | 671420.98 | 1.75 | 120791.54 | 0.00 | 1375.79 | -2.36 |
| 21 | 7.83 | 15.47 | 99.40 | 128572.28 | 489447.02 | 3.36 | 353414.70 | 0.00 | 1174.10 | -2.95 |
| 22 | 11.93 | 10.91 | 821.70 | 72994.15 | 283421.90 | 4.05 | 617950.64 | 0.00 | 1297.57 | -3.10 |
| 23 | 9.97 | 16.86 | 44.08 | 168391.77 | 633622.78 | 1.70 | 168319.71 | 0.00 | 1340.43 | -0.49 |
| 24 | 8.78 | 17.39 | 215.58 | 188478.59 | 709253.93 | 1.70 | 77144.87 | 0.00 | 1177.02 | -2.90 |
| 25 | 18.32 | 2.25 | 2964.50 | 18586.99 | 71349.62 | 5.91 | 911498.51 | 0.00 | 951.59 | -2.90 |
| 26 | 10.58 | 10.54 | 1467.45 | 77203.10 | 292518.34 | 4.77 | 605278.91 | 0.00 | 1419.46 | -2.81 |
| 27 | 12.36 | 11.45 | 1706.41 | 79642.20 | 304184.66 | 4.32 | 599211.96 | 66.68 | 935.30 | -2.95 |
| 28 | 8.72 | 16.37 | 76.96 | 142232.36 | 538911.88 | 3.27 | 288819.62 | 0.00 | 1460.44 | -2.68 |
| 29 | 19.37 | 13.09 | 1145.70 | 81766.69 | 311648.44 | 2.94 | 573008.04 | 0.00 | 1494.92 | -2.78 |
| 30 | 12.78 | 15.99 | 69.61 | 128341.92 | 485544.30 | 2.13 | 355709.24 | 0.00 | 1451.96 | -1.34 |
| 31 | 6.81 | 16.54 | 68.19 | 155726.07 | 589179.62 | 1.98 | 227153.93 | 0.00 | 1296.03 | -3.01 |
| 32 | 7.55 | 16.18 | 20.94 | 136754.97 | 518796.30 | 1.70 | 315693.73 | 0.00 | 1322.21 | -2.59 |
| 33 | 6.04 | 17.81 | 5.82 | 198500.53 | 745478.40 | 1.70 | 37688.24 | 0.00 | 1041.57 | -5.53 |
| 34 | 15.94 | 10.16 | 1401.55 | 59666.66 | 227668.01 | 3.96 | 692758.14 | 0.00 | 1241.62 | -2.84 |
| 35 | 12.24 | 13.54 | 78.84 | 57490.21 | 223077.80 | 4.77 | 695871.80 | 0.00 | 1568.25 | -2.29 |
| 36 | 5.41 | 17.73 | 54.80 | 191533.61 | 720241.27 | 1.70 | 62815.15 | 0.00 | 1330.63 | -3.12 |
| 37 | 6.86 | 16.79 | 17.85 | 168863.60 | 636156.73 | 1.70 | 172276.09 | 0.00 | 1088.16 | -2.45 |
| 38 | 9.85 | 12.30 | 478.60 | 90772.14 | 349644.45 | 1.83 | 535416.70 | 0.00 | 1255.25 | -1.79 |
| 39 | 7.16 | 17.01 | 15.26 | 184784.44 | 698710.86 | 1.70 | 101541.08 | 0.00 | 854.02 | -2.92 |
| 40 | 6.10 | 17.65 | 5.61 | 191462.97 | 721072.34 | 1.70 | 74272.15 | 0.00 | 873.33 | -3.00 |
| 41 | 10.98 | 17.08 | 4.44 | 190876.94 | 718470.58 | 1.70 | 74182.23 | 0.00 | 974.75 | -3.05 |
| 42 | 7.19 | 17.55 | 8.02 | 191158.60 | 722194.16 | 1.70 | 74502.96 | 0.00 | 807.54 | -3.24 |
| 43 | 5.96 | 17.90 | 33.40 | 191677.19 | 723981.38 | 1.70 | 67801.04 | 0.00 | 1018.27 | -3.11 |
| 44 | 7.42 | 17.84 | 1.24 | 207012.53 | 776572.39 | 1.70 | 2076.43 | 0.00 | 965.50 | -2.89 |
| 45 | 6.03 | 16.54 | 2.84 | 202213.48 | 758487.29 | 1.70 | 22496.97 | 0.00 | 1038.92 | -1.58 |
| 46 | 5.60 | 17.87 | 3.51 | 205398.61 | 769735.94 | 1.70 | 8174.11 | 0.00 | 1064.83 | -5.20 |
| 47 | 13.72 | 18.02 | 5.89 | 206122.95 | 774217.28 | 1.70 | 2345.88 | 0.00 | 1088.95 | -1.85 |
| 48 | 6.15 | 18.00 | 2.16 | 204373.23 | 765643.04 | 1.70 | 9489.41 | 0.00 | 1257.69 | -1.70 |
| 49 | 6.08 | 17.65 | 10.22 | 183291.20 | 689414.64 | 1.70 | 105168.08 | 0.00 | 1009.83 | -0.96 |
| 50 | 7.25 | 17.27 | 30.59 | 136658.68 | 515342.66 | 1.75 | 322684.49 | 0.00 | 999.38 | -2.02 |
| 51 | 7.58 | 17.21 | 28.78 | 174878.14 | 659788.33 | 1.70 | 143844.43 | 0.00 | 931.90 | -2.81 |
| 52 | 7.73 | 17.84 | 19.45 | 199424.82 | 750347.10 | 1.70 | 31490.75 | 0.00 | 937.55 | -1.59 |
| 53 | 5.75 | 17.81 | 5.32 | 201735.68 | 758853.25 | 1.70 | 18780.81 | 0.00 | 1069.34 | -2.12 |
| 54 | 5.67 | 17.55 | 0.92 | 189917.33 | 714180.69 | 1.70 | 79839.17 | 0.00 | 733.68 | -2.20 |
| 55 | 6.21 | 17.08 | 3.90 | 158675.30 | 598505.62 | 2.13 | 219586.47 | 0.00 | 969.40 | -0.01 |
| 56 | 5.32 | 17.90 | 0.99 | 202842.18 | 761669.08 | 1.70 | 14347.58 | 0.00 | 1089.97 | -5.11 |
| 57 | 5.86 | 17.81 | 3.02 | 189247.75 | 712351.87 | 1.70 | 74493.97 | 0.00 | 1090.16 | -2.15 |
| 58 | 5.24 | 17.87 | 1.10 | 204914.92 | 768815.58 | 1.70 | 5112.18 | 0.00 | 1088.73 | -8.06 |
| 59 | 5.32 | 17.55 | 0.92 | 189917.33 | 714180.69 | 1.70 | 79839.17 | 0.00 | 733.68 | -7.91 |
| 60 | 6.15 | 17.90 | 2.63 | 198470.42 | 746042.79 | 1.70 | 34384.10 | 0.00 | 1049.89 | -1.65 |
| 61 | 8.52 | 17.45 | 0.92 | 204900.18 | 770034.84 | 2.06 | 2392.77 | 0.00 | 1110.91 | -10.71 |
| 62 | 5.70 | 17.45 | 1.46 | 205746.94 | 772735.85 | 1.70 | 984.58 | 0.00 | 998.01 | -10.11 |
| 63 | 6.22 | 17.87 | 1.56 | 197473.94 | 741018.64 | 1.70 | 50951.65 | 0.00 | 1177.51 | -2.31 |
| 64 | 5.78 | 16.94 | 1.03 | 187061.44 | 702367.87 | 1.70 | 97786.88 | 0.00 | 1212.89 | -3.31 |
| 65 | 5.30 | 18.07 | 0.71 | 205388.52 | 770182.64 | 1.70 | 14051.01 | 0.00 | 1147.48 | -2.56 |
| 66 | 6.06 | 17.73 | 0.50 | 204450.43 | 765595.57 | 1.70 | 6540.27 | 0.00 | 1454.24 | -3.38 |
| 67 | 15.47 | 17.77 | 1.21 | 207112.45 | 776136.01 | 1.70 | 3901.64 | 0.00 | 1271.64 | -5.74 |
| 68 | 5.85 | 17.55 | 1.95 | 207192.55 | 776805.59 | 1.70 | 6395.07 | 0.00 | 1181.75 | -1.87 |
| 69 | 5.57 | 17.39 | 2.13 | 195672.54 | 734122.26 | 1.70 | 55643.25 | 0.00 | 1250.75 | -2.86 |
| 70 | 5.55 | 18.06 | 1.42 | 207236.10 | 775842.89 | 1.70 | 8696.93 | 0.00 | 1041.67 | -2.75 |
| 71 | 5.47 | 17.45 | 2.41 | 200869.61 | 752676.65 | 1.70 | 31388.50 | 0.00 | 1238.20 | -5.28 |
| 72 | 8.58 | 18.02 | 3.51 | 192316.63 | 721876.30 | 1.70 | 74970.59 | 0.00 | 1097.01 | -1.26 |
| 73 | 5.51 | 16.79 | 1.95 | 197476.25 | 741129.14 | 1.70 | 49677.57 | 0.00 | 1154.31 | -2.85 |
| 74 | 6.74 | 17.77 | 1.28 | 208601.69 | 781922.73 | 1.70 | 4458.50 | 0.00 | 1792.28 | -2.56 |
| 75 | 6.20 | 17.84 | 1.85 | 207837.79 | 779387.73 | 2.06 | 1002.44 | 0.00 | 1179.02 | -5.75 |
| 76 | 6.73 | 17.87 | 1.14 | 204793.84 | 768368.06 | 1.70 | 15378.96 | 0.00 | 1132.89 | -10.32 |
| 77 | 10.36 | 18.05 | 0.82 | 206499.46 | 774102.18 | 1.70 | 6984.83 | 0.00 | 1175.23 | -3.36 |
| 78 | 6.61 | 17.21 | 13.20 | 171901.75 | 648048.43 | 1.98 | 156259.81 | 0.00 | 1147.99 | -3.58 |
| 79 | 6.19 | 17.55 | 11.50 | 181964.34 | 685220.82 | 1.70 | 109961.62 | 0.00 | 1138.25 | -2.84 |
| 80 | 5.81 | 17.08 | 2.09 | 195815.07 | 735448.25 | 1.70 | 48515.04 | 0.00 | 1052.23 | -2.85 |
| 81 | 6.39 | 17.77 | 2.63 | 199160.94 | 747239.42 | 1.70 | 32600.67 | 0.00 | 1151.15 | -2.59 |
| 82 | 5.84 | 17.55 | 3.12 | 193025.58 | 725711.43 | 1.70 | 59452.35 | 0.00 | 1107.82 | -2.43 |
| 83 | 5.51 | 17.73 | 1.88 | 199120.38 | 747843.28 | 1.70 | 32258.80 | 0.00 | 1133.53 | -2.94 |
| 84 | 6.63 | 17.60 | 6.10 | 194163.46 | 730046.30 | 1.70 | 54065.69 | 0.00 | 1147.57 | -2.72 |
| 85 | 5.73 | 17.84 | 2.16 | 199301.95 | 748328.04 | 1.70 | 31762.44 | 0.00 | 1145.10 | -2.89 |
| 86 | 5.94 | 17.98 | 2.52 | 200791.47 | 753812.52 | 1.70 | 20990.66 | 0.00 | 1290.44 | -1.69 |
| 87 | 9.69 | 17.81 | 2.52 | 203446.00 | 763679.83 | 1.70 | 10866.69 | 0.00 | 1227.36 | -2.97 |
| 88 | 5.65 | 17.73 | 3.19 | 201458.15 | 755839.23 | 1.70 | 21660.27 | 0.00 | 1180.05 | -3.43 |
| 89 | 5.46 | 17.77 | 3.76 | 205458.41 | 769904.16 | 1.70 | 4510.61 | 0.00 | 1104.06 | -2.30 |
| 90 | 5.63 | 17.96 | 1.38 | 204881.55 | 768868.32 | 1.70 | 3683.52 | 0.00 | 1239.82 | -3.62 |
| 91 | 5.27 | 17.84 | 6.67 | 205535.68 | 771002.50 | 1.70 | 900.48 | 0.00 | 1168.19 | -8.00 |
| 92 | 6.50 | 17.84 | 0.89 | 206054.18 | 772440.10 | 1.70 | 2513.35 | 0.00 | 1074.79 | -7.73 |
| 93 | 5.78 | 17.50 | 1.35 | 197769.48 | 742649.44 | 1.70 | 51835.51 | 0.00 | 920.56 | -9.70 |
| 94 | 17.80 | 17.50 | 1.77 | 185237.28 | 698604.21 | 1.70 | 106971.14 | 0.00 | 959.72 | -3.03 |
| 95 | 28.86 | 17.84 | 0.99 | 203596.80 | 763450.62 | 1.70 | 26418.08 | 0.00 | 857.68 | -3.04 |
| 96 | 5.91 | 17.84 | 1.10 | 200151.06 | 750637.16 | 1.70 | 41608.97 | 0.00 | 914.07 | -0.59 |
| 97 | 5.40 | 17.98 | 3.94 | 201903.31 | 760335.40 | 1.70 | 42121.49 | 0.00 | 817.26 | -2.94 |
| 98 | 5.78 | 17.93 | 3.55 | 203165.75 | 765981.09 | 1.70 | 30492.14 | 0.00 | 935.04 | -1.15 |
| 99 | 5.27 | 17.98 | 2.20 | 208151.39 | 783655.93 | 1.70 | 9356.83 | 0.00 | 835.68 | -3.17 |
| 100 | 5.92 | 17.93 | 2.09 | 202234.00 | 762045.73 | 1.70 | 35760.89 | 0.00 | 811.39 | -1.63 |
| 101 | 5.92 | 17.93 | 6.14 | 191909.88 | 723352.48 | 1.70 | 81332.04 | 0.00 | 895.52 | -3.19 |
| 102 | 5.40 | 17.98 | 1.60 | 207380.37 | 779694.89 | 1.70 | 9339.70 | 0.00 | 955.51 | -2.99 |
| 103 | 5.37 | 17.93 | 1.77 | 208979.73 | 785812.73 | 1.70 | 1108.87 | 0.00 | 932.50 | -2.50 |
| 104 | 9.65 | 17.84 | 3.58 | 204704.19 | 770389.37 | 1.70 | 21917.54 | 0.00 | 854.34 | -8.07 |
| 105 | 5.96 | 17.98 | 2.34 | 208602.08 | 783964.32 | 1.70 | 1381.26 | 0.00 | 885.64 | -3.14 |
| 106 | 5.34 | 17.96 | 1.56 | 209075.14 | 786442.23 | 1.83 | 567.81 | 0.00 | 890.61 | -9.53 |
| 107 | 6.04 | 17.98 | 3.23 | 207837.01 | 781835.54 | 1.70 | 5305.75 | 0.00 | 907.18 | -8.44 |
| 108 | 5.96 | 17.96 | 1.92 | 207856.85 | 781993.25 | 1.70 | 7120.35 | 0.00 | 847.05 | -2.89 |
| 109 | 5.68 | 18.02 | 1.56 | 208814.64 | 785408.85 | 1.75 | 847.64 | 0.00 | 973.39 | -1.74 |
| 110 | 8.31 | 17.96 | 1.88 | 208843.84 | 786020.65 | 1.70 | 573.77 | 0.00 | 949.16 | -11.00 |
| 111 | 6.75 | 18.00 | 1.49 | 208408.63 | 783890.44 | 1.75 | 606.51 | 0.00 | 1039.74 | -10.03 |
| 112 | 6.77 | 17.96 | 3.44 | 196967.91 | 740917.12 | 1.70 | 52349.27 | 0.00 | 1135.31 | -14.18 |
| 113 | 5.71 | 17.27 | 12.60 | 193234.69 | 725979.21 | 1.70 | 55243.79 | 0.00 | 1291.96 | -0.06 |
| 114 | 5.73 | 17.81 | 5.93 | 199242.46 | 748040.49 | 1.70 | 29059.33 | 0.00 | 1222.62 | -2.50 |
| 115 | 5.75 | 17.87 | 2.59 | 204422.89 | 766093.14 | 1.70 | 6183.60 | 0.00 | 1220.43 | -2.83 |
| 116 | 5.24 | 18.07 | 4.61 | 207403.31 | 780901.80 | 1.70 | 7308.01 | 0.00 | 987.73 | -2.94 |
| 117 | 5.87 | 18.05 | 2.45 | 207746.76 | 781485.84 | 1.70 | 2795.46 | 0.00 | 1182.91 | -1.23 |
| 118 | 5.63 | 17.73 | 4.61 | 203972.16 | 764634.75 | 1.70 | 13180.70 | 0.00 | 1028.80 | -5.34 |
| 119 | 5.70 | 17.69 | 4.68 | 198312.52 | 745211.35 | 1.70 | 40856.68 | 0.00 | 1087.83 | -7.14 |
| 120 | 5.24 | 17.50 | 0.75 | 206166.46 | 773237.54 | 1.70 | 905.69 | 0.00 | 1056.83 | -2.08 |
| 121 | 7.23 | 17.15 | 1.17 | 204147.08 | 765926.49 | 1.98 | 4246.33 | 0.00 | 1407.65 | -2.43 |
| 122 | 7.47 | 18.02 | 2.24 | 203078.17 | 764471.95 | 1.70 | 28611.61 | 0.00 | 944.03 | -1.67 |
| 123 | 5.96 | 17.73 | 3.12 | 185318.24 | 699296.53 | 1.70 | 113152.22 | 0.00 | 868.40 | -7.84 |
| 124 | 5.32 | 18.00 | 2.56 | 205726.35 | 774293.39 | 1.70 | 14277.54 | 0.00 | 1093.07 | -11.29 |
| 125 | 5.63 | 18.03 | 2.02 | 207766.98 | 781931.31 | 1.70 | 5383.93 | 0.00 | 1086.19 | -2.34 |
| 126 | 5.63 | 17.90 | 2.48 | 199269.89 | 750244.89 | 1.70 | 45147.76 | 0.00 | 1107.85 | -2.31 |
| 127 | 5.41 | 17.96 | 2.41 | 201487.56 | 758836.18 | 1.70 | 35511.50 | 0.00 | 1115.49 | -9.40 |
| 128 | 8.12 | 17.93 | 2.41 | 203541.75 | 766896.60 | 1.70 | 27819.95 | 0.00 | 983.53 | -4.18 |
| 129 | 5.66 | 17.98 | 1.70 | 209208.33 | 786856.69 | 1.70 | 2178.40 | 0.00 | 1038.43 | -0.41 |
| 130 | 5.55 | 17.98 | 1.74 | 208700.96 | 785219.56 | 1.70 | 1016.58 | 0.00 | 1183.05 | -2.41 |
| 131 | 5.83 | 18.03 | 1.56 | 207045.97 | 779692.51 | 1.70 | 9586.98 | 0.00 | 1114.38 | -2.37 |
| 132 | 5.54 | 18.02 | 2.56 | 207802.39 | 782441.14 | 1.70 | 5602.09 | 0.00 | 1122.38 | -9.27 |
| 133 | 7.67 | 17.90 | 3.37 | 198482.77 | 747994.15 | 1.70 | 52112.20 | 0.00 | 1024.63 | -6.38 |
| 134 | 6.22 | 18.02 | 2.59 | 206759.47 | 778795.39 | 1.70 | 12044.50 | 0.00 | 1056.77 | -1.98 |
| 135 | 6.06 | 18.02 | 5.78 | 206443.89 | 777282.49 | 1.70 | 9238.40 | 0.00 | 1217.33 | -1.78 |
| 136 | 5.81 | 18.03 | 2.02 | 208748.85 | 786082.64 | 1.70 | 1017.33 | 0.00 | 1139.03 | -2.91 |
| 137 | 6.07 | 17.90 | 2.02 | 205182.37 | 771122.28 | 1.70 | 5136.74 | 0.00 | 987.37 | -3.10 |
| 138 | 5.24 | 17.98 | 0.75 | 205271.27 | 770233.01 | 1.70 | 1118.54 | 0.00 | 1182.33 | -3.60 |
| 139 | 6.71 | 17.81 | 0.57 | 205960.57 | 772480.04 | 1.70 | 632.56 | 0.00 | 1066.13 | -10.89 |
| 140 | 5.24 | 17.98 | 0.89 | 206427.56 | 775038.82 | 1.83 | 564.84 | 0.00 | 988.84 | -9.69 |
| 142 | 8.11 | 17.15 | 9.09 | 150495.59 | 569937.46 | 3.10 | 277073.13 | 0.00 | 897.55 | -8.41 |
| 143 | 7.16 | 17.21 | 11.64 | 145765.65 | 551518.40 | 3.02 | 298922.35 | 0.00 | 960.95 | -8.79 |
| 144 | 5.32 | 17.98 | 2.52 | 204562.95 | 770252.50 | 1.70 | 24648.66 | 0.00 | 977.52 | -8.46 |
| 145 | 10.26 | 15.68 | 9.09 | 118253.91 | 450349.71 | 3.87 | 425922.42 | 0.00 | 1087.87 | -2.40 |
| 146 | 6.48 | 17.55 | 3.90 | 164637.89 | 622538.36 | 1.90 | 207109.73 | 0.00 | 1087.74 | -1.51 |
| 147 | 7.33 | 17.01 | 14.30 | 162665.28 | 618668.98 | 1.83 | 215616.03 | 0.00 | 919.23 | -1.57 |
| 148 | 5.59 | 17.98 | 4.93 | 203213.42 | 765466.91 | 1.70 | 28651.16 | 0.00 | 1072.42 | -2.66 |
| 149 | 5.48 | 17.98 | 5.00 | 203103.36 | 765516.28 | 1.70 | 28993.66 | 0.00 | 1064.24 | -1.69 |
| 150 | 5.49 | 18.02 | 1.88 | 204677.03 | 767657.44 | 1.70 | 8880.15 | 0.00 | 1130.52 | -2.83 |
| 151 | 5.29 | 17.93 | 2.66 | 207156.39 | 779780.61 | 1.70 | 11917.10 | 0.00 | 1016.42 | -0.54 |
| 152 | 6.58 | 17.73 | 8.77 | 187910.84 | 710839.92 | 1.70 | 96856.41 | 0.00 | 1049.64 | -2.62 |
| 153 | 15.98 | 17.69 | 7.52 | 178813.19 | 675037.27 | 1.98 | 141107.74 | 0.00 | 1132.77 | -2.31 |
| 154 | 6.70 | 17.27 | 9.55 | 181130.19 | 685169.99 | 1.90 | 130173.89 | 0.00 | 1057.86 | -1.50 |
| 155 | 6.05 | 17.65 | 4.37 | 188658.19 | 712509.52 | 1.98 | 92945.45 | 0.00 | 1171.44 | -2.70 |
| 156 | 5.96 | 17.98 | 5.64 | 192283.59 | 725625.31 | 1.75 | 76271.66 | 0.00 | 1261.49 | -2.84 |
| 157 | 5.61 | 17.73 | 3.80 | 197965.90 | 745739.79 | 1.70 | 45541.62 | 0.00 | 1235.37 | -2.83 |
| 158 | 5.64 | 17.87 | 4.40 | 199304.27 | 750865.72 | 1.70 | 39707.06 | 0.00 | 1267.38 | -2.71 |
| 159 | 5.38 | 17.69 | 3.02 | 203899.64 | 764413.09 | 1.70 | 9859.60 | 0.00 | 1300.57 | -2.89 |
| 160 | 5.42 | 17.60 | 1.99 | 206170.73 | 772110.13 | 1.70 | 2170.96 | 0.00 | 1172.85 | -2.73 |
| 161 | 5.31 | 17.39 | 0.50 | 206192.88 | 772383.52 | 1.70 | 1050.82 | 0.00 | 1211.21 | -2.69 |
| 162 | 7.23 | 17.81 | 1.46 | 204718.16 | 766841.98 | 1.70 | 10518.07 | 0.00 | 1088.52 | -1.19 |
| 163 | 5.59 | 17.90 | 2.63 | 195991.15 | 737746.07 | 1.70 | 63804.81 | 0.00 | 1090.52 | -0.40 |
| 164 | 6.31 | 16.79 | 4.37 | 164495.67 | 619324.35 | 1.70 | 191647.70 | 0.00 | 1254.19 | -8.59 |
| 165 | 5.42 | 17.90 | 2.41 | 203609.99 | 766752.23 | 1.70 | 27743.10 | 0.00 | 1145.34 | -10.41 |
| 166 | 5.55 | 17.93 | 2.87 | 199795.81 | 752167.76 | 1.70 | 44412.41 | 0.00 | 1148.84 | -1.89 |
| 167 | 8.11 | 17.93 | 2.70 | 196722.68 | 740296.23 | 1.70 | 55891.62 | 0.00 | 1181.79 | -0.43 |
| 168 | 5.45 | 17.21 | 1.74 | 205591.21 | 774325.26 | 1.75 | 17726.00 | 0.00 | 1097.57 | -2.15 |
| 112b | 5.94 | 17.81 | 12.35 | 189522.90 | 712233.64 | 1.70 | 71798.01 | 0.00 | 1354.19 | -0.54 |
| 118b | 9.37 | 17.73 | 3.48 | 205856.47 | 771918.06 | 1.70 | 6465.81 | 0.00 | 1123.37 | -0.46 |
| 62b | 6.04 | 17.65 | 17.39 | 184809.25 | 696751.87 | 1.70 | 95333.60 | 0.00 | 1052.10 | -2.75 |
